# Supplementary material for: The Profile of MicroRNA Expression in Bone Marrow in Non-Hodgkin’s Lymphomas
Source: MDPI journal article supplement (doi:10.3390/diagnostics12030629), 2022-03-03
Supplement: s1 [file s1]

**Table S2.** The sequences of primers and miRNA probes.

| Target      | Type               | Sequence (5' → 3')                                  |
|-------------|--------------------|-----------------------------------------------------|
| miR-10b-5p  | RT primer          | GTCAGAGCTGAGGCTCACTGAGACCTTTCGCACCCTCGCTCTGACCACAA  |
|             | Reverse PCR primer | CTGAGGCTCACTGAGACCT                                 |
|             | PCR probe          | (SIMA)-TTCGCACCC(T-BHQ1)CGCTCTGACCACAAATTCTG        |
|             | Forward PCR primer | ACCACTACCCTGTAGAACCG                                |
| miR-103a-3p | RT primer          | GTCGTGTCTGAGGCTCACTGAGACCTATTCGCACCCTCGACACGACTCAT  |
|             | Reverse PCR primer | CTGAGGCTCACTGAGACCT                                 |
|             | PCR probe          | (SIMA)-ATTCGCACCC(T-BHQ1)CGACACGACTCATAGCC          |
|             | Forward PCR primer | CAGCAGCAGCATTGTACAG                                 |
| miR-124-3p  | RT primer          | GTCGTGTCTGAGGCTCACTGAGACCTATTCGCACCCTCGACACGACGGCAT |
|             | Reverse PCR primer | CTGAGGCTCACTGAGACCT                                 |
|             | PCR probe          | (SIMA)-ATTCGCACC(T-BHQ1)CGACACGACGGCATTCA           |
|             | Forward PCR primer | ACATTCTAAGGCACGCGG                                  |
| miR-15a-5p  | RT primer          | CCTGAGTCGTGAACCAGACAGACACAATCGCACCTCGACTCAGGCACAA   |
|             | Reverse PCR primer | GTGAACCAGACAGACACAA                                 |
|             | PCR probe          | (SIMA)-TCGCACC(T-BHQ1)CGACTCAGGCACAAACC             |
|             | Forward PCR primer | CAACCATCTAGCAGCACATAAT                              |
| miR-182-5p  | RT primer          | GTCGTGTCTGAGGCTCACTGAGACCTTTCGCACCCTCGACACGACAGTGT  |
|             | Reverse PCR primer | CTGAGGCTCACTGAGACCT                                 |
|             | PCR probe          | (SIMA)-TTCGCACCC(T-BHQ1)CGACACGACAGTGTGAG           |
|             | Forward PCR primer | GGACTTTGGCAATGGTAGAA                                |
| miR-196b-5p | RT primer          | GTCGTGTCTGAGGCTCACTGAGTCCTATTCGCACCCTCGACACGACCCCA  |
|             | Reverse PCR primer | CTGAGGCTCACTGAGTCCT                                 |
|             | PCR probe          | (SIMA)-ATTCGCACC(T-BHQ1)CGACACGACCCCAACAA           |
|             | Forward PCR primer | CACCAGCTAGGTAGTTTCCTG                               |
| miR-20a-5p  | RT primer          | GTCGTGTCTGAGGCTCACTGAGACCTATTCGCACCCTCGACACGACCTACC |
|             | Reverse PCR primer | CTGAGGCTCACTGAGACCT                                 |
|             | PCR probe          | (SIMA)-ATTCGCACC(T-BHQ1)CGACACGACCTACCTGC           |
|             | Forward PCR primer | CACCAGCTAAAGTGCTTATAGTG                             |

|            |                    |                                                           |
|------------|--------------------|-----------------------------------------------------------|
| miR-221-3p | RT primer          | GTCGTGTCTGAGGCTCACTGAGACCTATTCGCACCTCGACACGACGAAAC        |
|            | Reverse PCR primer | CTGAGGCTCACTGAGACCT                                       |
|            | PCR probe          | (SIMA)-ATTCGCACC(T-BHQ1)CGACACGACGAAACCCAG                |
|            | Forward PCR primer | CAGCAGCTACATTGTCTGC                                       |
| miR-23b-3p | RT primer          | GTCGTGTCTGAGGCTCACTGAGACCTTTCGCACCCTCGACACGACGGAAAC       |
|            | Reverse PCR primer | CTGAGGCTCACTGAGACCT                                       |
|            | PCR probe          | (SIMA)-TTCGCACCC(T-BHQ1)CGACACGACGGAAATCC                 |
|            | Forward PCR primer | CAGCACATCACATTGCCAG                                       |
| miR-29b-3p | RT primer          | GTCGTGTCTGAGGCTCACTGAGACCTTTCGCACCCTCGACACGACAA(C-LNA)GAT |
|            | Reverse PCR primer | CTGAGGCTCACTGAGACCT                                       |
|            | PCR probe          | (SIMA)-TTCGCACCC(T-BHQ1)CGACACGACAACACTGAT                |
|            | Forward PCR primer | CAGCACTAGCACCATTGAA                                       |
| miR-30a-5p | RT primer          | GTCGTGTCGTGAACCAGACAGACACAATTCGCACCCTCGACACGACCTT         |
|            | Reverse PCR primer | GTGAACCAGACAGACACAA                                       |
|            | PCR probe          | (SIMA)-TTCGCACCC(T-BHQ1)CGACACGACCTTCCAGT                 |
|            | Forward PCR primer | AGGCCTGTAAACATCCTCG                                       |
| miR-7-5p   | RT primer          | CTGAGTCGTGAACCAGACAGACACAACCTACGCTCTCCGACTCAGGCAC         |
|            | Reverse PCR primer | GTGAACCAGACAGACACAA                                       |
|            | PCR probe          | (SIMA)-CCTA(C-LNA)GCTC(T-BHQ1)CCGACTCAGGCACAACAAA         |
|            | Forward PCR primer | AGCGTCTGGAAGACTAGTGA                                      |
| miR-145-5p | RT primer          | CGTGTGCGCTTGTAGCACGACCTTATTCGCACCCTCGACACGACAGGGATTC      |
|            | Reverse PCR primer | GCCTTGTAGCACGACCTTA                                       |
|            | PCR probe          | (R6G)-TTCGCACCC(T-BHQ1)CGACACGACAGGGATTC                  |
|            | Forward PCR primer | ACACGTCCAGTTTCCCAG                                        |
| miR-155-5p | RT primer          | GTCAGAGCGCTCTTCTAGCACCACTCTATCCTACCCTCGCTCTGACACCCCTA     |
|            | Reverse PCR primer | GCTCTTCTAGCACCACTCTA                                      |
|            | PCR probe          | (R6G)-TCCTACCC(T-BHQ1)CGCTCTGACACCCCTA                    |
|            | Forward PCR primer | CCCAGCTTAATGCTAATCGTGA                                    |
| let-7a-5p  | RT primer          | GTCGTGTCTGAGGCTCACTGACACAATTCGCACCCTCGACACGACAACCTATAC    |
|            | Reverse PCR primer | CTGAGGCTCACTGACACAA                                       |
|            | PCR probe          | (R6G)-C+C+C+T+CGA+CACGACAACCTATAC-(BHQ1)                  |
|            | Forward PCR primer | CAGCACTGAGGTAGTAGGTT                                      |
| miR-16-5p  | RT primer          | GTCGTGTCTGAGGCTCACTGAGACCTATTCGCACCTCGACACGACCGCCAATA     |
|            | Reverse PCR primer | CTGAGGCTCACTGAGACCT                                       |
|            | PCR probe          | (R6G)-ATTCGCACC(T-BHQ1)CGACACGACCGCCAATA                  |
|            | Forward PCR primer | CCAGCTAGCAGCACGTAAA                                       |

|             |                    |                                                        |
|-------------|--------------------|--------------------------------------------------------|
| miR-181a-5p | RT primer          | GTCGTGTCTGAGGCTCACTGAGACCTATTCGCACCTCGACACGACACCCACCG  |
|             | Reverse PCR primer | CTGAGGCTCACTGAGACCT                                    |
|             | PCR probe          | (R6G)-ATTCGCACC(T-BHQ1)CGACACGACACCCACCG               |
|             | Forward PCR primer | CCAGCAACATTCATTGCTGT                                   |
| miR-191-5p  | RT primer          | GTCGTGTCTGAGGCTCACTGAGACCTATTCGCACCTCGACACGACCAGCTGCT  |
|             | Reverse PCR primer | CTGAGGCTCACTGAGACCT                                    |
|             | PCR probe          | (R6G)-ATTCGCACC(T-BHQ1)CGACACGACCAGCTGCT               |
|             | Forward PCR primer | CAGCCAACGGAATCCCAA                                     |
| miR-26a-5p  | RT primer          | CGTGATGCGCCTTGTAGCACGACCTTATTCGCACCCTCGCATCACGAGCCTATC |
|             | Reverse PCR primer | GCCTTGTAGCACGACCTTA                                    |
|             | PCR probe          | (R6G)-TTCGCACCC(T-BHQ1)CGCATCACGAGCCTATC               |
|             | Forward PCR primer | CGAGCCATTCAAGTAATCCAG                                  |
| miR-378-3p  | RT primer          | GTCGTGTCTGAGGCTCACTGAGACCTATTCGCACCTCGACACGACGCCTTCTG  |
|             | Reverse PCR primer | CTGAGGCTCACTGAGACCT                                    |
|             | PCR probe          | (R6G)-ATTCGCACC(T-BHQ1)CGACACGACGCCTTCTG               |
|             | Forward PCR primer | CTGAGGCTCACTGAGACCT                                    |

(+C=C-LNA; +T=T-LNA; R6G -Rhodamine 6G (Rhodamine 590); BHQ1 - Black Hole Quencher-1; LNA - Locked Nucleic Acid).
